# Supplementary material
Source: PubMed Central journal article supplement (PMC2876234)
Supplement: NIHMS203001-supplement-1_si_001.pdf [file NIHMS203001-supplement-1_si_001.pdf]

## Supplemental Material

### The Kinetic Mechanism for DNA Unwinding by Multiple Molecules of Dda Helicase Aligned on DNA<sup>†</sup>

Robert L. Eoff<sup>1</sup> & Kevin D. Raney\*,

Department of Biochemistry & Molecular Biology, University of Arkansas for Medical Sciences, Little Rock, AR 72205

Running title: DNA unwinding by multiple helicases aligned on DNA

\*Corresponding Author: Kevin D. Raney, University of Arkansas for Medical Sciences, Department of Biochemistry & Molecular Biology, slot 516, 4301 W. Markham St., Little Rock, AR 72205, Tel.: (501) 686-5244, Fax: (501) 686-8169, E-mail: [raneykevind@uams.edu](mailto:raneykevind@uams.edu)

<sup>1</sup>current address: Department of Biochemistry, Vanderbilt University School of Medicine, Nashville, TN, 37232

<sup>†</sup> This work was supported by the National Institutes of Health grant R01 GM059400 (K.D.R) and the UAMS Committee for Allocation of Graduate Student Research Funds (R.L.E).

Abbreviations: RQF – Rapid Quench Flow; NLLS – non-linear least squares.

Mechanisms for data fitting using the program Kinetic Global Kinetic Explorer.

Mechanisms were written using the Model Editor of the program according to the following definitions:

- D1: DNA substrate
- D2: DNA substrate after one kinetic step for unwinding
- D3: DNA substrate after two kinetic steps for unwinding
- D4: DNA substrate after three kinetic steps for unwinding
- P: DNA substrate after sufficient number of kinetic steps for ssDNA to form
- E: One molecule of Dda
- EE: Two molecules of Dda
- EEE: Three molecules of Dda
- EEEE: Four molecules of Dda
- A: The trailing molecule of Dda after dissociation of the leading molecule (see Fig. 2 for explanation of the trailing molecule)
- B: The trailing molecule of Dda after one kinetic step for translocation

### **DNA unwinding of the 14T16bp substrate in 3 kinetic steps with three Dda molecules.**

ED1 = ED2 = ED3 = EP  
ED1 = E + D1  
ED2 = E + D2  
ED3 = E + D3  
EED1 = EED2 = EED3 = EEP  
EED1 = ED1  
EED2 = ED2  
EED3 = ED3  
EED1 = E + AD1  
EED2 = E + AD2  
EED3 = E + AD3  
AD1 = BD1  
AD2 = BD2  
AD3 = BD3  
BD1 = ED1  
BD2 = ED2  
BD3 = ED3  
AD1 = E + D1  
AD2 = E + D2  
AD3 = E + D3  
BD1 = E + D1  
BD2 = E + D2  
BD3 = E + D3

$\text{Chi}^2 = 0.01377$   
 $\text{Chi}^2/\text{DoF} = 0.001059$   
 $\text{Sigma} = 0.0325$

**DNA unwinding of the 14T20bp substrate in 4 kinetic steps with two Dda molecules.**

$$ED1 = ED2 = ED3 = ED4 = EP$$

$$ED1 = E + D1$$

$$ED2 = E + D2$$

$$ED3 = E + D3$$

$$ED4 = E + D4$$

$$EED1 = EED2 = EED3 = EED4 = EEP$$

$$EED1 = ED1$$

$$EED2 = ED2$$

$$EED3 = ED3$$

$$EED4 = ED4$$

$$EED1 = E + AD1$$

$$EED2 = E + AD2$$

$$EED3 = E + AD3$$

$$EED4 = E + AD4$$

$$AD1 = BD1$$

$$AD2 = BD2$$

$$AD3 = BD3$$

$$AD4 = BD4$$

$$BD1 = ED1$$

$$BD2 = ED2$$

$$BD3 = ED3$$

$$BD4 = ED4$$

$$AD1 = E + D1$$

$$AD2 = E + D2$$

$$AD3 = E + D3$$

$$AD4 = E + D4$$

$$BD1 = E + D1$$

$$BD2 = E + D2$$

$$BD3 = E + D3$$

$$BD4 = E + D4$$

$$\text{Chi}^2 = 0.00350236$$

$$\text{Chi}^2/\text{DoF} = 0.000269412$$

$$\text{Sigma} = 0.0164$$

**DNA unwinding of the 21T16bp substrate in 3 kinetic steps with three Dda molecules.**

$$ED1 = ED2 = ED3 = EP$$

$$ED1 = E + D1$$

$$ED2 = E + D2$$

$$ED3 = E + D3$$

$$EED1 = EED2 = EED3 = EEP$$

$$EED1 = ED1$$

$$EED2 = ED2$$

$$EED3 = ED3$$

$$EEED1 = EEED2 = EED3 = EEEP$$

$$EEED1 = E + EED1$$

$$EEED2 = E + EED2$$

$$EEED3 = E + EED3$$

$$EEED1 = EAD1$$

$$EEED2 = EAD2$$

$$EEED3 = EAD3$$

$$EED1 = E + AD1$$

$$EED2 = E + AD2$$

$$EED3 = E + AD3$$

$$EAD1 = EED1$$

$$EAD2 = EED2$$

$$EAD3 = EED3$$

$$AD1 = BD1$$

$$AD2 = BD2$$

$$AD3 = BD3$$

$$BD1 = ED1$$

$$BD2 = ED2$$

$$BD3 = ED3$$

$$AD1 = E + D1$$

$$AD2 = E + D2$$

$$AD3 = E + D3$$

$$BD1 = E + D1$$

$$BD2 = E + D2$$

$$BD3 = E + D3$$

$$\text{Chi}^2 = 0.0221537$$

$$\text{Ch}^2/\text{DoF} = 0.00170413$$

$$\text{Sigma} = 0.0412811$$

## DNA unwinding of the 21T20bp substrate in 3 kinetic steps with three Dda molecules.

$$ED1 = ED2 = ED3 = ED4 = EP$$

$$ED1 = E + D1$$

$$ED2 = E + D2$$

$$ED3 = E + D3$$

$$ED4 = E + D4$$

$$EED1 = EED2 = EED3 = EED4 = EEP$$

$$EED1 = E + ED1$$

$$EED2 = E + ED2$$

$$EED3 = E + ED3$$

$$EED4 = E + ED4$$

$$EEED1 = EEED2 = EEED3 = EEED4 = EEEP$$

$$EEED1 = E + EED1$$

$$EEED2 = E + EED2$$

$$EEED3 = E + EED3$$

$$EEED4 = E + EED4$$

$$EEED1 = EAD1$$

$$EEED2 = EAD2$$

$$EEED3 = EAD3$$

$$EEED4 = EAD4$$

$$EED1 = E + AD1$$

$$EED2 = E + AD2$$

$$EED3 = E + AD3$$

$$EED4 = E + AD4$$

$$EAD1 = EBD1 = EED1$$

$$EAD2 = EBD2 = EED2$$

$$EAD3 = EBD3 = EED3$$

$$EAD4 = EBD4 = EED4$$

$$AD1 = BD1 = ED1$$

$$AD2 = BD2 = ED2$$

$$AD3 = BD3 = ED3$$

$$AD4 = BD4 = ED4$$

$$AD1 = E + D1$$

$$AD2 = E + D2$$

$$AD3 = E + D3$$

$$AD4 = E + D4$$

$$BD1 = E + D1$$

$$BD2 = E + D2$$

$$BD3 = E + D3$$

$$BD4 = E + D4$$

$$\text{Chi}^2 = 0.0121836$$

$$\text{Ch}^2/\text{DoF} = 0.000937204$$

$$\text{Sigma} = 0.0306138$$

## DNA unwinding of the 28T16bp substrate in 3 kinetic steps with four Dda molecules.

$$ED1 = ED2 = ED3 = EP$$

$$ED1 = E + D1$$

$$ED2 = E + D2$$

$$ED3 = E + D3$$

$$EED1 = EED2 = EED3 = EEP$$

$$EED1 = ED1$$

$$EED2 = ED2$$

$$EED3 = ED3$$

$$EEED1 = EEED2 = EEED3 = EEEP$$

$$EEED1 = E + EED1$$

$$EEED2 = E + EED2$$

$$EEED3 = E + EED3$$

$$EEEEED1 = EEEEEED2 = EEEEEED3 = EEEEEEP$$

$$EEEEED1 = E + EEED1$$

$$EEEEED2 = E + EEED2$$

$$EEEEED3 = E + EEED3$$

$$EEED1 = EAD1$$

$$EEED2 = EAD2$$

$$EEED3 = EAD3$$

$$EEEEED1 = EEAD1$$

$$EEEEED2 = EEAD2$$

$$EEEEED3 = EEAD3$$

$$EEAD1 = EEED1 = EEED1$$

$$EEAD2 = EEED2 = EEED2$$

$$EEAD3 = EEED3 = EEED3$$

$$EED1 = E + AD1$$

$$EED2 = E + AD2$$

$$EED3 = E + AD3$$

$$EAD1 = EBD1 = EED1$$

$$EAD2 = EBD2 = EED2$$

$$EAD3 = EBD3 = EED3$$

$$AD1 = BD1$$

$$AD2 = BD2$$

$$AD3 = BD3$$

$$BD1 = ED1$$

$$BD2 = ED2$$

$$BD3 = ED3$$

$$AD1 = E + D1$$

$$AD2 = E + D2$$

$$AD3 = E + D3$$

$$BD1 = E + D1$$

$$BD2 = E + D2$$

$$BD3 = E + D3$$

$$\text{Chi}^2 = 0.0263758$$

$$\text{Ch}^2/\text{DoF} = 0.00219798$$

$$\text{Sigma} = 0.0468826$$

### Mechanism for DNA unwinding of the 28T16bp substrate in 3 kinetic steps.

ED1 = ED2 = ED3 = ED4 = EP  
ED1 = E + D1  
ED2 = E + D2  
ED3 = E + D3  
ED4 = E + D4  
EED1 = EED2 = EED3 = EED4 = EEP  
EED1 = ED1  
EED2 = ED2  
EED3 = ED3  
EED4 = ED4  
EEED1 = EEED2 = EEED3 = EEED4 = EEEP  
EEED1 = E + EED1  
EEED2 = E + EED2  
EEED3 = E + EED3  
EEED4 = E + EED4  
EEEEED1 = EEEEEED2 = EEEEEED3 = EEEEEED4 = EEEEEEP  
EEEEED1 = E + EEEEEED1  
EEEEED2 = E + EEEEEED2  
EEEEED3 = E + EEEEEED3  
EEEEED4 = E + EEEEEED4  
EEED1 = EAD1  
EEED2 = EAD2  
EEED3 = EAD3  
EEED4 = EAD4  
EEEEED1 = EEAD1  
EEEEED2 = EEAD2  
EEEEED3 = EEAD3  
EEEEED4 = EEAD4  
EEAD1 = EEBD1 = EEED1  
EEAD2 = EEBD2 = EEED2  
EEAD3 = EEBD3 = EEED3  
EED1 = E + AD1  
EED2 = E + AD2  
EED3 = E + AD3  
EAD1 = EBD1 = EED1  
EAD2 = EBD2 = EED2  
EAD3 = EBD3 = EED3  
AD1 = BD1  
AD2 = BD2  
AD3 = BD3  
BD1 = ED1  
BD2 = ED2  
BD3 = ED3  
AD1 = E + D1  
AD2 = E + D2  
AD3 = E + D3  
BD1 = E + D1  
BD2 = E + D2  
BD3 = E + D3

$$\text{Chi}^2 = 0.00912995$$

$$\text{Ch}^2/\text{DoF} = 0.000702303$$

$$\text{Sigma} = 0.026501$$
